# Supplementary material for: The Protective Effects of Reineckia carnea Ether Fraction against Alzheimer’s Disease Pathology: An Exploration in Caenorhabditis elegans Models
Source: MDPI journal article supplement (doi:10.3390/ijms242216536), 2023-11-20
Supplement: s1 [file s1]

## Supplemental Material

### Supplemental Figures

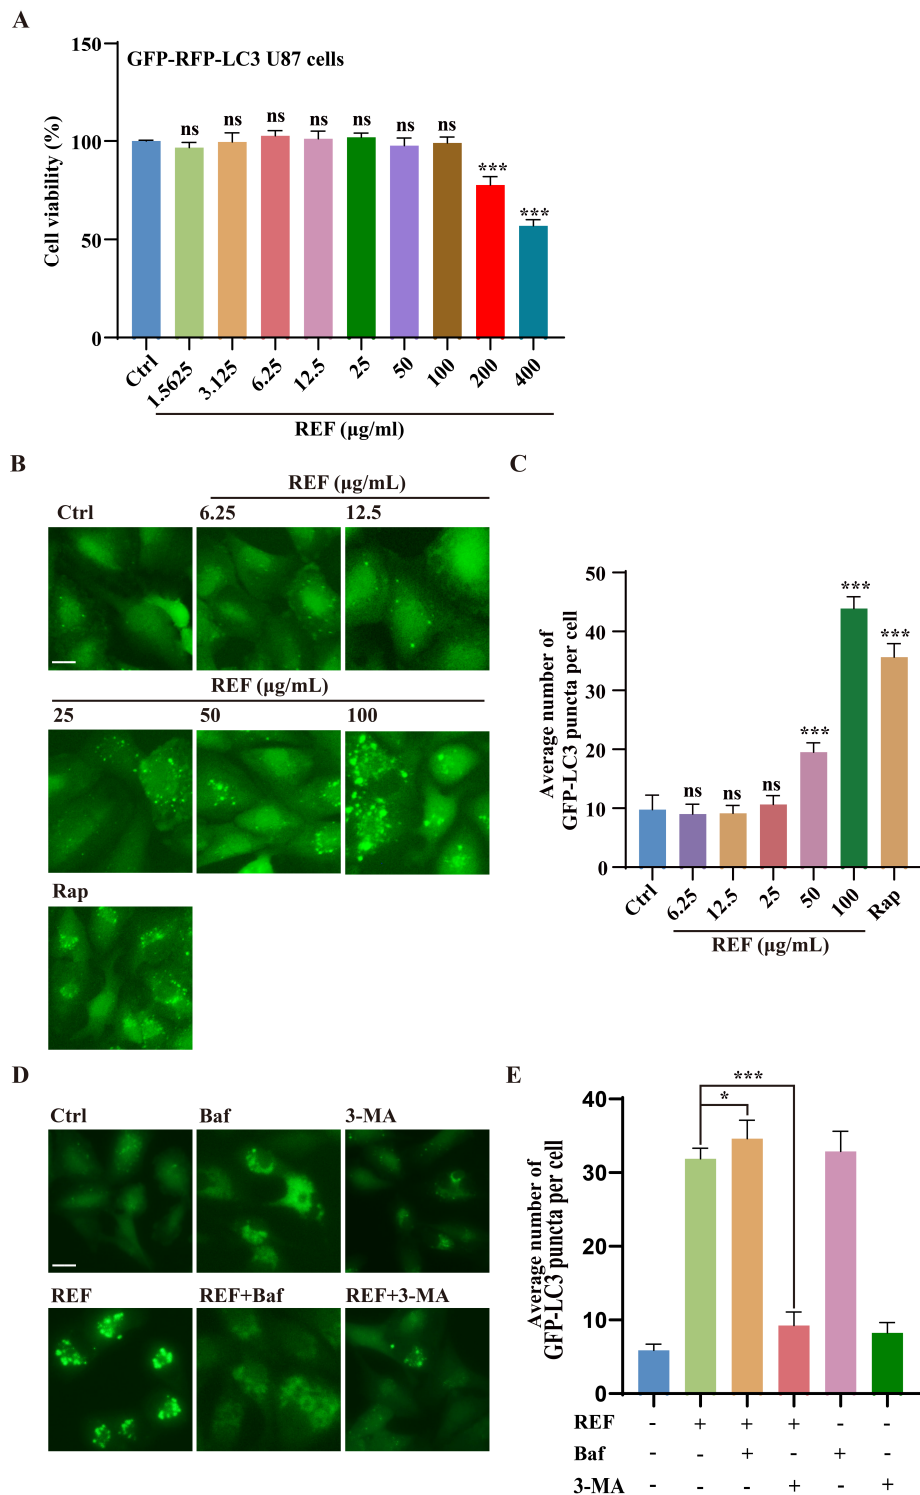

**Figure S1. REF induces autophagy in U87 cells.** (A) Bar graph indicates the viability of GFP-RFP-LC3 U87 cells treated with different concentrations of REF. Data: mean

$\pm$  SD (n= 3 independent experiments), ns  $p > 0.05$ , \*\*\*  $p < 0.001$ . **(B-C)** Representative fluorescent images indicate GFP-LC3 puncta in GFP-RFP-LC3 U87 cells treated with different concentrations of REF. Scale bars: 50  $\mu$ m. Bar graph indicates the number of GFP-LC3 puncta in GFP-positive cells. Data: mean  $\pm$  SD (n= 3 independent experiments), ns  $p > 0.05$ , \*\*\*  $p < 0.001$ . **(D-E)** Representative fluorescent images indicate GFP-LC3 puncta in GFP-RFP-LC3 U87 cells treated with autophagy inhibitors 3-MA and Baf in the presence or absence of REF. Scale bars: 50  $\mu$ m. Bar graph indicates the number of GFP-LC3 puncta in GFP-positive cells. Data: mean  $\pm$  SD (n= 3 independent experiments), \*  $p < 0.05$ , \*\*\*  $p < 0.001$ .

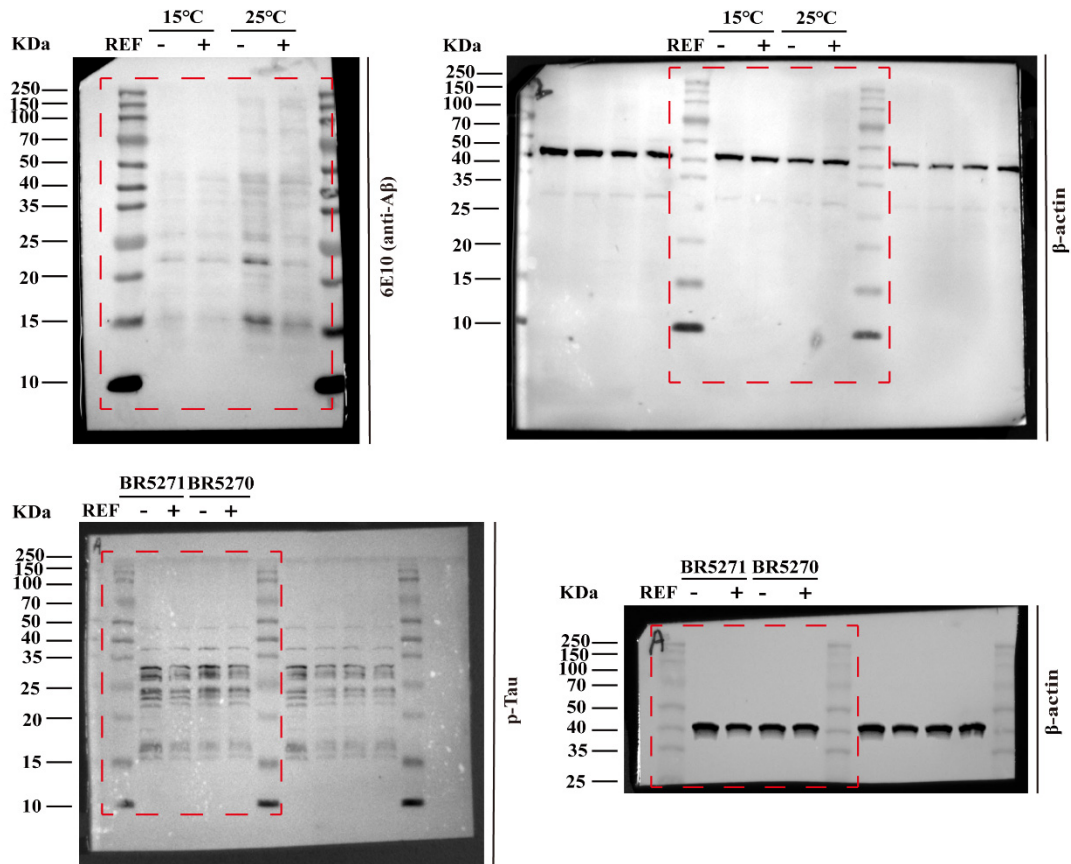

**Figure S2. Full-length Western blotting images of Fig. 3.**

---

## Supplemental Tables

**Table S1. Information on the *C. elegans* strains used in this study.**

| Strain | Descriptions                                                           | Website                                                                           |
|--------|------------------------------------------------------------------------|-----------------------------------------------------------------------------------|
| N2     | Wild-type. <i>C. elegans</i> var Bristol                               | <a href="https://cgc.umn.edu/strain/N2">https://cgc.umn.edu/strain/N2</a>         |
| CL4176 | dvIs27 [myo-3p::A-Beta (1-42)::let-851 3'UTR) + rol-6(su1006)] X       | <a href="https://cgc.umn.edu/strain/CL4176">https://cgc.umn.edu/strain/CL4176</a> |
| CL2006 | vIs2 [pCL12(unc-54/human Abeta peptide 1-42 minigene) + rol-6(su1006)] | <a href="https://cgc.umn.edu/strain/CL2006">https://cgc.umn.edu/strain/CL2006</a> |
| CL2331 | dvIs37 [myo-3p::GFP::A-Beta (3-42) + rol-6(su1006)]                    | <a href="https://cgc.umn.edu/strain/CL2331">https://cgc.umn.edu/strain/CL2331</a> |
| BR5270 | byIs161 [rab-3p::F3(delta)K280 + myo-2p::mCherry]                      | <a href="https://cgc.umn.edu/strain/BR5270">https://cgc.umn.edu/strain/BR5270</a> |
| BR5271 | yIs162 [rab-3p::F3(delta)K280 I277P I380P + myo-2p::mCherry]           | <a href="https://cgc.umn.edu/strain/BR5271">https://cgc.umn.edu/strain/BR5271</a> |
| DA2123 | dIs2122 [lgg-1p::GFP::lgg-1 + rol-6(su1006)]                           | <a href="https://cgc.umn.edu/strain/DA2123">https://cgc.umn.edu/strain/DA2123</a> |

---

---



---

BC12921 Is10729 [rCes T12G3.1::GFP + <https://cgc.umn.edu/strain/BC12921>  
pCeh361]

---

**Table S2. Primer sequences for qRT-PCR.**

| <b>Gene name</b>      | <b>Primer sequence (5'→3')</b> |
|-----------------------|--------------------------------|
| <i>lgg-1</i> Forward  | ACCCAGACCGTATTCCAGTG           |
| <i>lgg-1</i> Reverse  | TCGTGATGGTCCTGGTAGAGT          |
| <i>bec-1</i> Forward  | TCAGGACGAGCTTCATTCGC           |
| <i>bec-1</i> Reverse  | GCTCCAACAGGATCTCTAATAACA       |
| <i>unc-51</i> Forward | CTATGTTGATCGCACAGACG           |
| <i>unc-51</i> Reverse | CTCCGTGCATTTGAGTAGGC           |
| <i>vps-34</i> Forward | TGTCGATTCTGCCTACCGGA           |
| <i>vps-34</i> Reverse | CGTTGTTCGATCTTGAAAATAGCC       |
| <i>cdc42</i> Forward  | CTGCTGGACAGGAAGATTACG          |
| <i>cdc42</i> Reverse  | CTCGGACATTCTCGAATGAAG          |
